# Supplementary material for: Sigma-1 Receptor Is Critical for Mitochondrial Activity and Unfolded Protein Response in Larval Zebrafish
Source: MDPI journal article supplement (doi:10.3390/ijms222011049), 2021-10-13
Supplement: s1 [file s1]

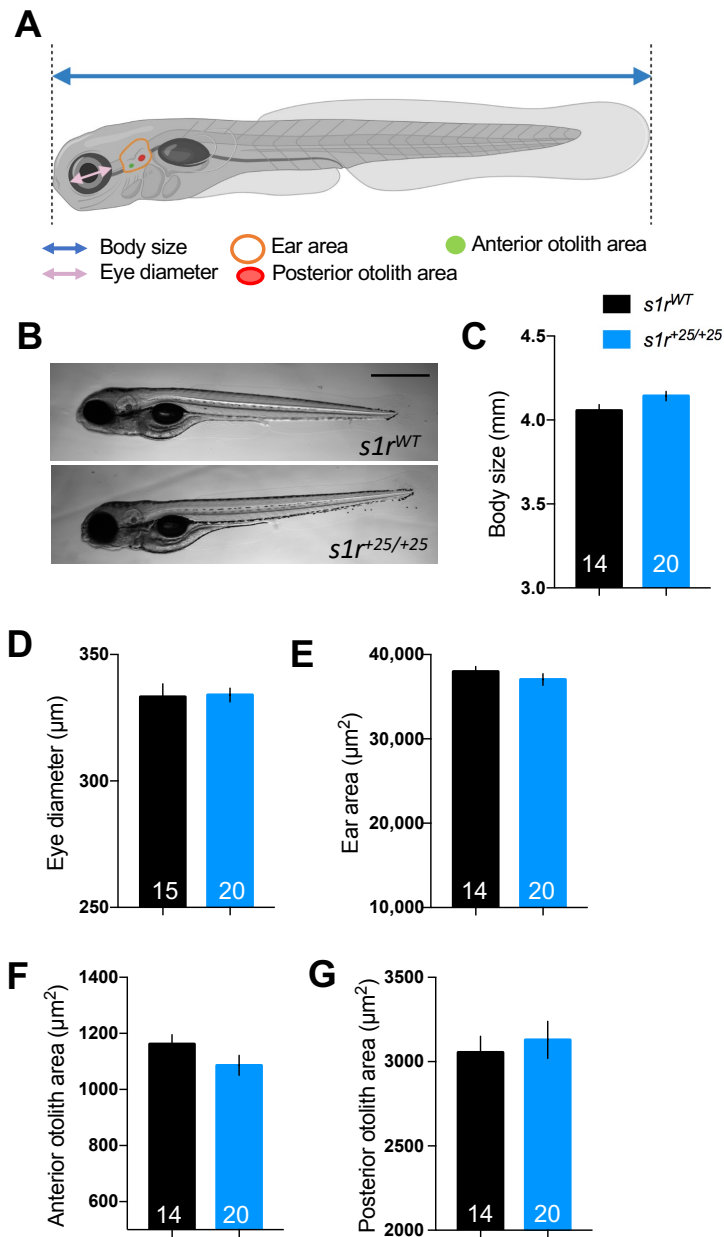

**Supplemental Figure S1. Morphology of *s1r<sup>+25/+25</sup>* larvae at 5 dpf.** (A) Schematic representation of the different measurements of the larva. (B) Images taken of wildtype or homozygous *s1r* mutant 5 dpf zebrafish. (C) Measurement of body length, from the mouth to the end of the tail fin and (D) the diameter of the eye. (E) The area of the ear, (F) anterior, (G) and posterior otolith were also analyzed. Scale = 1 mm. The number of animals is indicated within the columns.  $p > 0.05$  for all comparisons; unpaired t-test.

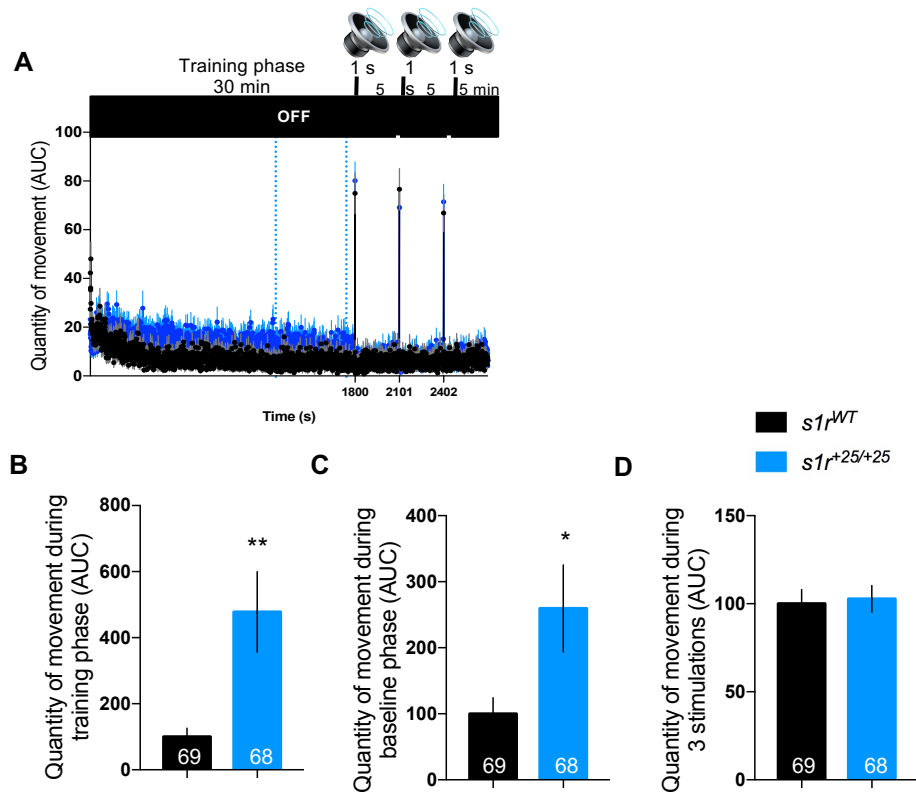

**Supplemental Figure S2. Analysis of the quantity of movement by the larvae at 5 dpf during the noise cycle in the ASR test. (A)** Protocol: the activity is measured for 45 min in a total dark (OFF 0%) condition, with a training phase for 30 min silently, then 3 cycles of white sounds (90 dB) of 1 s each and 5 min interspersed. **(A)** Quantity of movement per second for WT and mutant larvae according to the sound protocol. Relative quantity of movement during: **(B)** the training phase [blue dotted lines in **(A)**, between 21 and 29 min]; **(C)** the baseline phase, period of 2 min before each sound [the averaged 3 baseline phases]; **(D)** the 3 stimulations [the averaged sounds phases]. Activity were expressed as % of controls. Error bars represent  $\pm$  SEM calculated from three replicas. The number of animals is indicated within the columns. \*  $p < 0.05$ , \*\*  $p < 0.01$ ; unpaired t-test.

Western blot S1R  
Figure 1D

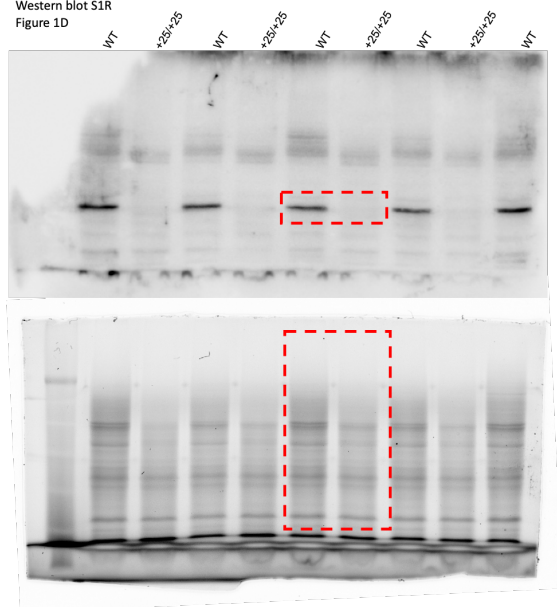

Western blot BiP  
Figure 5C

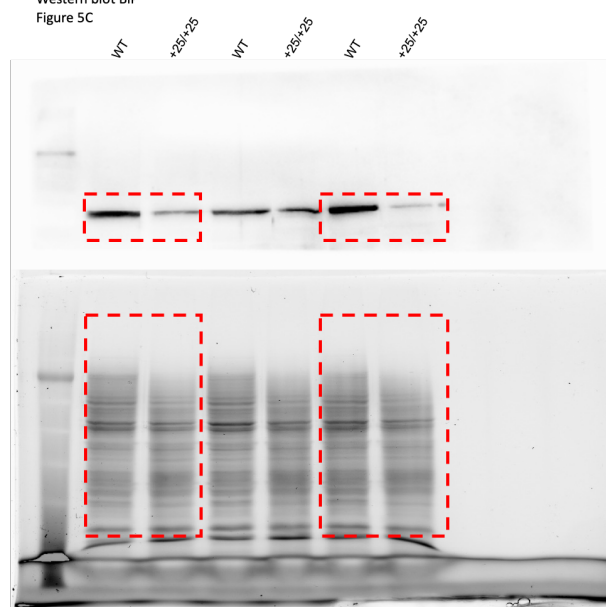

Western blot Eif2 $\alpha$   
Figure 5C

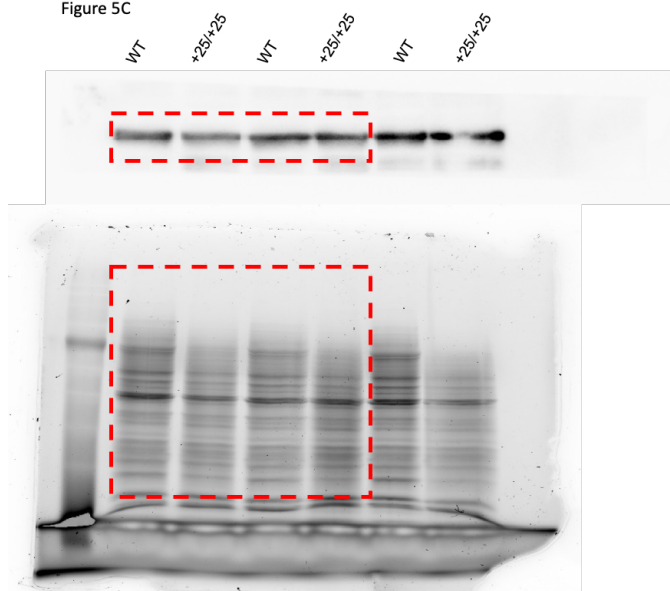

Western blot p-Eif2 $\alpha$   
Figure 5C

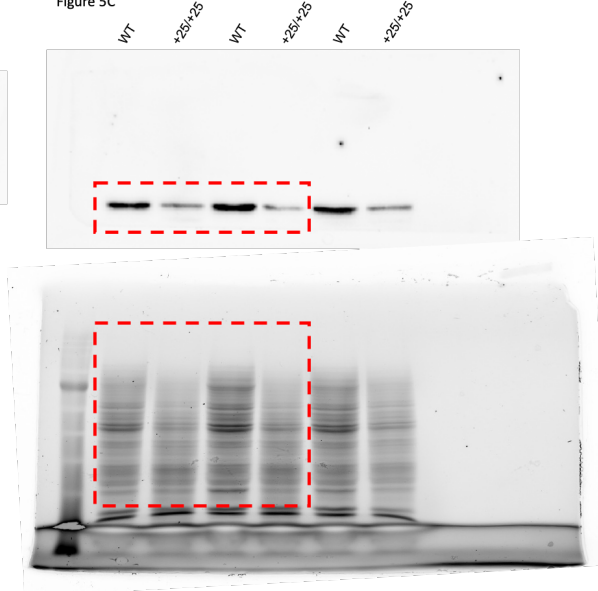

Western blot CHOP  
Figure 5C

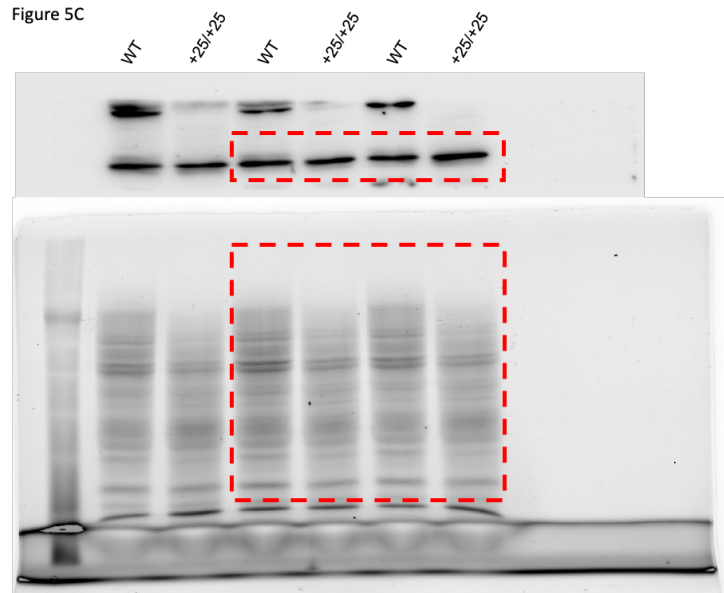

**Supplemental Figure S3. Original blots used in Figure 1 and in Figure 5.** The hatched line box indicate the lanes presented in the article and the respective stain-free zone used for normalization.

**Supplementary Table S1. List of primers used for qPCR analyses**

| <b>Target genes</b>            | <b>Sequences</b>                                                                 |
|--------------------------------|----------------------------------------------------------------------------------|
| <i>s1r</i>                     | <i>forward:</i> ATGAGCAGGCCTTCTCTAAGGT<br><i>reverse:</i> TAGTCGTCCCCTCTTTCCATTG |
| <i>bip</i>                     | <i>forward:</i> AAGAGGCCGAAGAGAAGGAC<br><i>reverse:</i> AGCAGCAGAGCCTCGAAATA     |
| <i>hsp90b1</i>                 | <i>forward:</i> GGCGTTAATCTGCTATTGAG<br><i>reverse:</i> GTCTTTGGTTTGTCTTGTC      |
| <i>ire1</i>                    | <i>forward:</i> TGACGTGGTGGAAAGTTGGTA<br><i>reverse:</i> ACGGATCACATTGGGATGTT    |
| <i>xbp1s</i>                   | <i>forward:</i> TGTTGCGAGACAAGACGA<br><i>reverse:</i> CCTGCACCTGCTGCGGACT        |
| <i>xbp1us</i>                  | <i>forward:</i> GGGTTGGATACCTTGGAAA<br><i>reverse:</i> AGGGCCAGGGCTGTGAGTA       |
| <i>perk</i>                    | <i>forward:</i> TGGGCTCTGAAGAGTTCGAT<br><i>reverse:</i> TGTCAGCCTTCTCCGTCTTT     |
| <i>eif2s1</i>                  | <i>forward:</i> CCAAAGATGAGCAGCTGGAGA<br><i>reverse:</i> ATCCGACACAGCCTGCTTAAA   |
| <i>atf4<math>\alpha</math></i> | <i>forward:</i> CCGGGAATCATGGCAGTGTA<br><i>reverse:</i> GAGAAGCTGCGGTATTTGCG     |
| <i>atf4<math>\beta</math></i>  | <i>forward:</i> TGACCCTCTGCGGTCAATTC<br><i>reverse:</i> ACGAATGATCTTCACCACTGTCT  |
| <i>atf4<math>\beta</math></i>  | <i>forward:</i> TGACCCTCTGCGGTCAATTC<br><i>reverse:</i> ACGAATGATCTTCACCACTGTCT  |
| <i>perk</i>                    | <i>forward:</i> TGGGCTCTGAAGAGTTCGAT<br><i>reverse:</i> TGTCAGCCTTCTCCGTCTTT     |
| <i>atf6</i>                    | <i>forward:</i> CTGTGGTGAAACCTCCACCT<br><i>reverse:</i> CATGGTGACCACAGGAGATG     |
| <i>chop</i>                    | <i>forward:</i> CTGATTGGTGCGATGACTGC<br><i>reverse:</i> ACTCGGGCTCCTTCTCTGAA     |
| <i>zef1<math>\alpha</math></i> | <i>forward:</i> TTCTGTTACCTGGCAAAGGG<br><i>reverse:</i> TTCAGTTTGTCCAACACCCA     |

## Supplementary Table S2. Statistical analyses report

### Figure 1.

(C) Mann-Whitney:  $p < 0.0001$

(E) Mann-Whitney:  $p = 0.0286$

### Figure 2.

(B) Unpaired  $t$ -test:  $t_{(96)} = 0.4381$ ,  $p = 0.6623$

(C) Unpaired  $t$ -test:  $t_{(96)} = 2.861$ ,  $p = 0.0052$

(D) Unpaired  $t$ -test:  $t_{(96)} = 2.504$ ,  $p = 0.0140$

(F) Unpaired  $t$ -test:  $t_{(102)} = 1.798$ ,  $p = 0.0751$

(G) Unpaired  $t$ -test:  $t_{(46)} = 0.05299$ ,  $p = 0.958$

### Figure 3.

(A) Unpaired  $t$ -test:  $t_{(10)} = 9.072$ ,  $p < 0.0001$

(B) Unpaired  $t$ -test:  $t_{(10)} = 0.5687$ ,  $p = 0.5821$

(D) Unpaired  $t$ -test:  $t_{(16)} = 0.6290$ ,  $p = 0.5382$

(F) Unpaired  $t$ -test:  $t_{(10)} = 2.988$ ,  $p = 0.0136$

### Figure 4.

(A) Unpaired  $t$ -test: bip:  $t_{(19)} = 0.08225$ ,  $p = 0.9353$

hsp90b1:  $t_{(19)} = 1.912$ ,  $p = 0.0710$

ire1:  $t_{(22)} = 6.202$ ,  $p < 0.0001$

xbp1s:  $t_{(21)} = 14.24$ ,  $p < 0.0001$

xbp1us:  $t_{(22)} = 14.96$ ,  $p < 0.0001$

perk:  $t_{(21)} = 3.252$ ,  $p = 0.00382$

eif2s1:  $t_{(22)} = 8.838$ ,  $p < 0.0001$

atf4 $\alpha$ :  $t_{(22)} = 1.941$ ,  $p = 0.06516$

atf4 $\beta$ :  $t_{(22)} = 2.519$ ,  $p = 0.01954$

atf6:  $t_{(22)} = 0.4258$ ,  $p = 0.6744$

chop:  $t_{(22)} = 2.421$ ,  $p = 0.02418$

(B) Unpaired  $t$ -test: Bip:  $t_{(16)} = 3.859$ ,  $p = 0.0014$

p-Eif2s1/Eif2s1:  $t_{(15)} = 3.365$ ,  $p = 0.0043$

Chop:  $t_{(16)} = 1.146$ ,  $p = 0.2685$

### Figure 5.

(A) Two-way ANOVA:

*s1r*:  $F_{(1,16)} = 536.8$ ,  $p < 0.0001$  for the genotype,  $F_{(1,16)} = 4.831$ ,  $p = 0.043$  for the treatment,  $F_{(1,16)} = 4.831$ ,  $p = 0.043$  for the interaction

*bip*:  $F_{(1,16)} = 4.38$ ,  $p = 0.0527$  for the genotype,  $F_{(1,16)} = 74.78$ ,  $p < 0.0001$  for the treatment,  $F_{(1,16)} = 5.577$ ,  $p = 0.0312$  for the interaction

*hsp90b1*:  $F_{(1,16)} = 2.868$ ,  $p = 0.1097$  for the genotype,  $F_{(1,16)} = 68.37$ ,  $p < 0.0001$  for the treatment,  $F_{(1,16)} = 1.264$ ,  $p = 0.2775$  for the interaction

*ire1*:  $F_{(1,16)} = 19.95$ ,  $p = 0.0004$  for the genotype,  $F_{(1,16)} = 284.4$ ,  $p < 0.0001$  for the treatment,  $F_{(1,16)} = 8.056$ ,  $p = 0.0119$  for the interaction

*xbp1s*:  $F_{(1,16)} = 26.81$ ,  $p < 0.0001$  for the genotype,  $F_{(1,16)} = 165.6$ ,  $p < 0.0001$  for the treatment,  $F_{(1,16)} = 9.391$ ,  $p = 0.0074$  for the interaction

*xbp1us*:  $F_{(1,16)} = 37.74$ ,  $p < 0.0001$  for the genotype,  $F_{(1,16)} = 54.33$ ,  $p < 0.0001$  for the treatment,  $F_{(1,16)} = 7.201$ ,  $p = 0.0163$  for the interaction

*perk*:  $F_{(1,16)} = 4.382$ ,  $p = 0.0526$  for the genotype,  $F_{(1,16)} = 99.24$ ,  $p < 0.001$  for the treatment,  $F_{(1,16)} = 1.330$ ,  $p = 0.2658$  for the interaction  
*eif2s1*:  $F_{(1,16)} = 2.669$ ,  $p = 0.1218$  for the genotype,  $F_{(1,16)} = 2.801$ ,  $p = 0.1136$  for the treatment,  $F_{(1,16)} = 1.073$ ,  $p = 0.3156$  for the interaction  
*atf4 $\alpha$* :  $F_{(1,16)} = 0.03893$ ,  $p = 0.8461$  for the genotype,  $F_{(1,16)} = 29.86$ ,  $p < 0.0001$  for the treatment,  $F_{(1,16)} = 2.411$ ,  $p = 0.1401$  for the interaction  
*atf4 $\beta$* :  $F_{(1,16)} = 24.85$ ,  $p = 0.0001$  for the genotype,  $F_{(1,16)} = 4.621$ ,  $p = 0.0472$  for the treatment,  $F_{(1,16)} = 2.925$ ,  $p = 0.1065$  for the interaction  
*atf6*:  $F_{(1,16)} = 23.53$ ,  $p = 0.0002$  for the genotype,  $F_{(1,16)} = 107.6$ ,  $p < 0.0001$  for the treatment,  $F_{(1,16)} = 6.983$ ,  $p = 0.0177$  for the interaction  
*chop*:  $F_{(1,16)} = 6.624$ ,  $p = 0.0204$  for the genotype,  $F_{(1,16)} = 1202$ ,  $p < 0.0001$  for the treatment,  $F_{(1,16)} = 0.2313$ ,  $p = 0.6371$  for the interaction

#### Figure 6.

- (B) Unpaired  $t$ -test:  $t_{(52)} = 3.279$ ,  $p = 0.0019$
- (C) Unpaired  $t$ -test:  $t_{(52)} = 3.352$ ,  $p = 0.00158$
- (D) Unpaired  $t$ -test:  $t_{(52)} = 0.5627$ ,  $p = 0.5761$
- (E) Unpaired  $t$ -test:  $t_{(52)} = 1.257$ ,  $p = 0.2144$
- (F) Unpaired  $t$ -test:  $t_{(52)} = 2.559$ ,  $p = 0.0135$

#### Figure 7.

- (B) Two-way ANOVA:  $F_{(1,68)} = 13.57$ ,  $p = 0.0005$  for the genotype,  $F_{(1,68)} = 21.23$ ,  $p < 0.0001$  for the treatment,  $F_{(1,68)} = 17.730$ ,  $p = 0.0070$  for the interaction
- (C) Two-way ANOVA:  $F_{(1,68)} = 13.05$ ,  $p = 0.0006$  for the genotype,  $F_{(1,68)} = 24.21$ ,  $p < 0.0001$  for the treatment,  $F_{(1,68)} = 9.639$ ,  $p = 0.028$  for the interaction
- (D) Two-way ANOVA:  $F_{(1,68)} = 5.490$ ,  $p = 0.0221$  for the genotype,  $F_{(1,68)} = 2.578$ ,  $p = 0.1130$  for the treatment,  $F_{(1,68)} = 0.006574$ ,  $p = 0.9356$  for the interaction
- (E) Two-way ANOVA:  $F_{(1,68)} = 5.153$ ,  $p = 0.0264$  for the genotype,  $F_{(1,68)} = 28.24$ ,  $p < 0.0001$  for the treatment,  $F_{(1,68)} = 0.3237$ ,  $p = 0.5713$  for the interaction
- (F) Two-way ANOVA:  $F_{(1,68)} = 5.265$ ,  $p = 0.0249$  for the genotype,  $F_{(1,68)} = 31.85$ ,  $p < 0.0001$  for the treatment,  $F_{(1,68)} = 0.002341$ ,  $p = 0.9616$  for the interaction

#### Supplementary Figure S1.

- (C) Unpaired  $t$ -test:  $t_{(32)} = 1.94$ ,  $p = 0.0612$
- (D) Unpaired  $t$ -test:  $t_{(33)} = 0.1337$ ,  $p = 0.8945$
- (E) Unpaired  $t$ -test:  $t_{(32)} = 1.000$ ,  $p = 0.3248$
- (F) Unpaired  $t$ -test:  $t_{(32)} = 1.473$ ,  $p = 0.1506$
- (G) Unpaired  $t$ -test:  $t_{(32)} = 0.481$ ,  $p = 0.6338$

#### Supplementary Figure S3.

- (B) Unpaired  $t$ -test:  $t_{(135)} = 3.034$ ,  $p = 0.0029$
- (C) Unpaired  $t$ -test:  $t_{(135)} = 2.286$ ,  $p = 0.0238$
- (D) Unpaired  $t$ -test:  $t_{(135)} = 0.2516$ ,  $p = 0.8017$
